# Supplementary material
Source: Royal Society of Chemistry journal article supplement (doi:10.1039/d6cc01274d)
Supplement: d6cc01274d1.pdf [file d6cc01274d1.pdf]

# Supporting Information:

## Excitons and Solar-Harvesting Potential of $\gamma$ -Graphyne

Bill D. Aparicio-Huacarpuma,<sup>\*,†</sup> Alysson M. Almeida Silva,<sup>‡</sup> Santosh K. Tiwari,<sup>¶</sup>  
Alexandre C. Dias,<sup>\*,§</sup> and Luiz A. Ribeiro Junior<sup>\*,†</sup>

<sup>†</sup>*Computational Materials Laboratory, LCCMat, Institute of Physics, University of Brasília, 70919-970, Brasília, DF, Brazil*

<sup>‡</sup>*Ceramic and Nanostructured Materials Laboratory, University of Brasília, College of Technology, Department of Mechanical Engineering, 70910-900, Brasília, Federal District, Brazil.*

<sup>¶</sup>*Centre for New Materials and Surface Engineering, Department of Chemistry, NMAM Institute of Technology (NMAMIT), Nitte (Deemed to be University), Nitte 574110, Karnataka, India.*

<sup>§</sup>*Institute of Physics and International Center of Physics, University of Brasília, 70910-900, Brasília, DF, Brazil.*

E-mail: bdaparicioh@gmail.com; alexandre.dias@unb.br; ribeirojr@unb.br

### S1 Computational Details

To investigate these properties in  $\gamma$ -graphyne, DFT simulations were conducted utilizing the Vienna Ab Initio Simulation Package (VASP)<sup>S1</sup> with the Projector Augmented-Wave (PAW)<sup>S2</sup> method. We did geometry optimizations using the Perdew–Burke–Ernzerhof (PBE) exchange–correlation functional<sup>S3</sup>. A plane-wave cutoff energy of 550 eV was used, and a Monkhorst–Pack k-point mesh of  $10 \times 10 \times 1$  was used to sample the Brillouin zone for geometry optimizations and  $20 \times 20 \times 1$  for electronic band structure and density of states calculations. A vacuum spacing of 20 Å was used in the out-of-plane direction to prevent spurious interactions

between periodic images. We achieved structural convergence using thresholds of  $10^{-6}$  eV for the total energy and  $0.01 \text{ eV \AA}^{-1}$  for the residual forces.

Although the precise structural parameters may exhibit small quantitative variations depending on the exchange–correlation functional, the overall planar topology of pristine  $\gamma$ -graphyne is robust. Since the system is treated here as a periodic monolayer, supercell-size effects are not expected to qualitatively alter the optimized primitive-cell geometry. In this context, the most relevant finite-size parameter is the vacuum separation. Case report

To address the well-known problem of semi-local functionals underestimating the band gap, the Heyd–Scuseria–Ernzerhof (HSE06)<sup>S4</sup> hybrid functional was employed for more accurate electronic band gap prediction. The Wannier90 package<sup>S5</sup> was used to make a tight-binding Hamiltonian from HSE06-level DFT calculations. This led to the creation of maximally localized Wannier functions. The WanTiBEXOS code<sup>S6</sup> was used to examine excitonic and optical properties, and the carbon s- and p-states were included in the orbital projections. We used two theoretical levels to calculate optical absorption spectra: the independent-particle approximation (IPA), which ignores excitonic effects, and the Bethe–Salpeter equation (BSE), which takes electron–hole interactions<sup>S6</sup>. The BSE calculations employed a 2D Coulomb-truncated potential with a  $120 \times 120 \times 1$  k-point grid. This simulation considers 8 conduction bands and valence bands for the description of the linear optical response in the solar emission range (0 to 4 eV). A Gaussian smearing of 0.05 eV was used to get the dielectric functions. We obtained the absorbance from the absorption coefficient, using a monolayer thickness defined as the intrinsic thickness plus a 3.3 Å van der Waals correction. We tested the solar-harvesting efficiency by determining the Shockley–Queisser (SQ) limit<sup>S7</sup> and the spectroscopy limited maximum efficiency (SLME)<sup>S8</sup> at 300 K under AM1.5G illumination<sup>S9</sup>.

## S2 Power Conversion Efficiency

Table S1: Photovoltaic performance metrics of  $\gamma$ -graphyne monolayer evaluated at the IPA and BSE levels compared with literature data. The spectroscopically limited maximum efficiency ( $\text{PCE}^{\text{SLME}}$ ) and its maximum value ( $\text{PCE}_{\text{max}}^{\text{SLME}}$ ) are reported, along with the SQ efficiency ( $\text{PCE}^{\text{SQ}}$ ) and the fill factor (FF), assuming a solar device operating at 300 K under AM1.5G illumination.

| Optical level                  | $\text{PCE}^{\text{SLME}}$ | $\text{PCE}_{\text{max}}^{\text{SLME}}$ | $\text{PCE}^{\text{SQ}}$ | FF    |
|--------------------------------|----------------------------|-----------------------------------------|--------------------------|-------|
| $\gamma$ -graphyne (IPA)       | 0.44                       | 28.08                                   | 28.08                    | 84.27 |
| $\gamma$ -graphyne (BSE)       | 0.41                       | 23.84                                   | 23.84                    | 82.29 |
| Penta-GRA (BSE) <sup>S10</sup> | 0.16                       | 7.49                                    | 7.58                     | -     |
| Me-GRA (BSE) <sup>S10</sup>    | 0.33                       | 14.40                                   | 31.81                    | -     |
| S-GY (IPA) <sup>S11</sup>      | 0.58                       | 26.89                                   | 31.84                    | -     |
| S-GY (BSE) <sup>S11</sup>      | 0.27                       | 22.44                                   | 32.27                    | -     |
| GDY (Exp. PCE) <sup>S12</sup>  | 10.34                      | -                                       | -                        | 72.14 |

## References

- (S1) Kresse, G.; Furthmüller, J. Efficient Iterative Schemes For *Ab Initio* Total-Energy Calculations Using a Plane-Wave Basis set. *Phys. Rev. B* **1996**, *54*, 11169–11186, DOI: 10.1103/physrevb.54.11169.
- (S2) Blöchl, P. E. Projector augmented-wave method. *Physical Review B* **1994**, *50*, 17953–17979, DOI: 10.1103/physrevb.50.17953.
- (S3) Perdew, J. P.; Burke, K.; Ernzerhof, M. Generalized Gradient Approximation Made Simple. *Physical Review Letters* **1996**, *77*, 3865–3868, DOI: 10.1103/physrevlett.77.3865.
- (S4) Heyd, J.; Scuseria, G. E.; Ernzerhof, M. Hybrid functionals based on a screened Coulomb potential. *The Journal of Chemical Physics* **2003**, *118*, 8207–8215, DOI: 10.1063/1.1564060.
- (S5) Mostofi, A. A.; Yates, J. R.; Lee, Y.-S.; Souza, I.; Vanderbilt, D.; Marzari, N. wannier90: A tool for obtaining maximally-localised Wannier functions. *Computer Physics Communications* **2008**, *178*, 685–699, DOI: 10.1016/j.cpc.2007.11.016.
- (S6) Dias, A. C.; Silveira, J. F.; Qu, F. WanTiBEXOS: A Wannier based Tight Binding code for electronic band structure, excitonic and optoelectronic properties of solids. *Computer Physics Communications* **2023**, *285*, 108636, DOI: 10.1016/j.cpc.2022.108636.
- (S7) Shockley, W.; Queisser, H. J. Detailed Balance Limit of Efficiency of p-n Junction Solar Cells. *Journal of Applied Physics* **1961**, *32*, 510–519, DOI: 10.1063/1.1736034.
- (S8) Yu, L.; Zunger, A. Identification of Potential Photovoltaic Absorbers Based on First-Principles Spectroscopic Screening of Materials. *Physical Review Letters* **2012**, *108*, 068701, DOI: 10.1103/physrevlett.108.068701.
- (S9) ASTM-G173-03 Standard Tables for Reference Solar Spectral Irradiances: Direct Normal and Hemispherical on 37° Tilted Surface, ASTM International, West Conshohocken, PA (2012). 2012; <https://doi.org/10.1520/g0173-03r20>.

- (S10) Cavaleiro Dias, A.; Almeida Cornélio, C. D.; Piotrowski, M. J.; Ribeiro Júnior, L. A.; de Oliveira Bastos, C. M.; Caldeira Rêgo, C. R.; Guedes-Sobrinho, D. Can 2D Carbon Allotropes Be Used as Photovoltaic Absorbers in Solar Harvesting Devices? *ACS Applied Energy Materials* **2024**, *7*, 8572–8582, DOI: 10.1021/acsaem.4c01544.
- (S11) Aparicio-Huacarpuma, B. D.; Villegas, C. E. P.; Meira, G. M. C.; Bastos, C. M. O.; Seridonio, A. C. F.; Dias, A. C.; Ribeiro, L. A.; Marinho, E. Structural effects on mechanical and optoelectronic properties of S-doped graphyne. *Physical Review B* **2026**, *113*, 035416, DOI: 10.1103/7v3w-11tz.
- (S12) Jin, Z.; Yuan, M.; Li, H.; Yang, H.; Zhou, Q.; Liu, H.; Lan, X.; Liu, M.; Wang, J.; Sargent, E. H.; Li, Y. Graphdiyne: An Efficient Hole Transporter for Stable High-Performance Colloidal Quantum Dot Solar Cells. *Advanced Functional Materials* **2016**, *26*, 5284–5289, DOI: 10.1002/adfm.201601570.
